# Supplementary material for: Differential co-expression analysis reveals a novel prognostic gene module in ovarian cancer
Source: PubMed Central journal article supplement (PMC5504034; doi:10.1038/s41598-017-05298-w), 2017-07-10
Supplement: 41598_2017_5298_MOESM1_ESM.pdf [file 41598_2017_5298_MOESM1_ESM.pdf]

**Differential co-expression analysis reveals a novel prognostic gene module in ovarian cancer**

Esra Gov<sup>1</sup>, Kazim Yalcin Arga<sup>1\*</sup>

<sup>1</sup>Department of Bioengineering, Marmara University, 34722 Goztepe, Istanbul,  
Turkey

Esra Gov: [esra.korurer@marmara.edu.tr](mailto:esra.korurer@marmara.edu.tr)

Kazim Yalcin Arga: [kazim.arga@marmara.edu.tr](mailto:kazim.arga@marmara.edu.tr)

**Supplementary Table S1:** Modules of the co-expression networks (CNC and CNO) and their topological parameters.

| <b>Module name</b> | <b># nodes</b> | <b># edges</b> | <b>Density</b> | <b>Average connectivity</b> |
|--------------------|----------------|----------------|----------------|-----------------------------|
| CMC Module 1       | 84             | 3078           | 0.88           | 38.50                       |
| CMC Module 2       | 14             | 83             | 0.91           | 5.93                        |
| CMC Module 3       | 5              | 9              | 0.90           | 1.80                        |
| CMC Module 4       | 10             | 15             | 0.33           | 1.50                        |
| CMC Module 5       | 4              | 5              | 0.83           | 1.25                        |
| CMC Module 6       | 4              | 5              | 0.83           | 1.25                        |
| CMC Module 7       | 3              | 3              | 1              | 1                           |
| CMC Module 8       | 3              | 3              | 1              | 1                           |
| CMC Module 9       | 3              | 3              | 1              | 1                           |
| CMC Module 10      | 3              | 3              | 1              | 1                           |
| CMO Module 1       | 52             | 1178           | 0.89           | 22.65                       |
| CMO Module 2       | 37             | 519            | 0.78           | 14.03                       |
| CMO Module 3       | 14             | 83             | 0.91           | 5.93                        |
| CMO Module 4       | 26             | 90             | 0.28           | 3.42                        |
| CMO Module 5       | 14             | 46             | 0.51           | 3.29                        |
| CMO Module 6       | 6              | 15             | 1              | 3                           |
| CMO Module 7       | 14             | 29             | 0.32           | 2.08                        |
| CMO Module 8       | 10             | 20             | 0.44           | 2.00                        |
| CMO Module 9       | 7              | 13             | 0.62           | 1.85                        |
| CMO Module 10      | 5              | 9              | 0.90           | 1.80                        |
| CMO Module 11      | 5              | 8              | 0.80           | 1.60                        |
| CMO Module 12      | 4              | 5              | 0.83           | 1.25                        |
| CMO Module 13      | 4              | 5              | 0.83           | 1.25                        |
| CMO Module 14      | 3              | 3              | 1              | 1                           |
| CMO Module 15      | 3              | 3              | 1              | 1                           |
| CMO Module 16      | 3              | 3              | 1              | 1                           |
| CMO Module 17      | 3              | 3              | 1              | 1                           |
| CMO Module 18      | 3              | 3              | 1              | 1                           |
| CMO Module 19      | 3              | 3              | 1              | 1                           |
| CMO Module 20      | 3              | 3              | 1              | 1                           |
| CMO Module 21      | 3              | 3              | 1              | 1                           |
| CMO Module 22      | 3              | 3              | 1              | 1                           |

**Supplementary Table S2:** Differentially co-expressed genes in ovarian cancer and their connectivity in CMC and CMO.

| <b>Gene Symbol</b> | <b>Gene name</b>                                                           | <b>Connection in CMC</b> | <b>Connection in CMO</b> |
|--------------------|----------------------------------------------------------------------------|--------------------------|--------------------------|
| AAA1               | Aortic aneurysm, familial abdominal 1                                      | 83                       | 2                        |
| BTRC               | Beta-transducin repeat containing E3 ubiquitin protein ligase              | 83                       | 9                        |
| C9orf93            | Chromosome 9 Open Reading Frame 93                                         | 83                       | 1                        |
| CTXN3              | Cortexin 3                                                                 | 83                       | 2                        |
| CYP19A1            | Cytochrome P450, family 19, subfamily A, polypeptide 1                     | 83                       | 11                       |
| DIRAS2             | DIRAS family, GTP-binding RAS-like 2                                       | 83                       | 8                        |
| GABRG1             | Gamma-aminobutyric acid (GABA) A receptor, gamma 1                         | 83                       | 3                        |
| GADL1              | Glutamate decarboxylase-like 1                                             | 83                       | 0                        |
| MTUS2              | Microtubule associated tumor suppressor candidate 2                        | 83                       | 8                        |
| NEGR1              | Neuronal growth regulator 1                                                | 83                       | 7                        |
| PCDP1              | Primary ciliary dyskinesia protein 1                                       | 83                       | 3                        |
| PDE5A              | Phosphodiesterase 5A, cGMP-specific                                        | 83                       | 1                        |
| PDE8B              | Phosphodiesterase 8B                                                       | 83                       | 2                        |
| PKD1L2             | Polycystic kidney disease 1-like 2                                         | 83                       | 1                        |
| PPM1E              | Protein phosphatase, Mg <sup>2+</sup> /Mn <sup>2+</sup> dependent, 1E      | 83                       | 1                        |
| PRG4               | Proteoglycan 4                                                             | 83                       | 0                        |
| SLC3A1             | Solute carrier family 3 (amino acid transporter heavy chain), member 1     | 83                       | 5                        |
| SNCAIP             | Synuclein, alpha interacting protein                                       | 83                       | 2                        |
| SV2C               | Synaptic vesicle glycoprotein 2C                                           | 83                       | 6                        |
| ZIC4               | Zic family member 4                                                        | 83                       | 1                        |
| ZNF566             | Zinc finger protein 566                                                    | 83                       | 13                       |
| CELF4              | CUGBP, Elav-like family member 4                                           | 82                       | 0                        |
| CNR1               | Cannabinoid receptor 1 (brain)                                             | 82                       | 0                        |
| FBXL3              | F-box and leucine-rich repeat protein 3                                    | 82                       | 3                        |
| LHX9               | LIM homeobox 9                                                             | 82                       | 0                        |
| PAPOLG             | Poly(A) polymerase gamma                                                   | 82                       | 0                        |
| SVEP1              | Sushi, von Willebrand factor type A, EGF and pentraxin domain containing 1 | 82                       | 0                        |
| DSCAML1            | Down syndrome cell adhesion molecule like 1                                | 81                       | 0                        |
| IQGAP3             | IQ motif containing GTPase activating protein 3                            | 81                       | 2                        |
| CDC14A             | Cell division cycle 14A                                                    | 80                       | 8                        |
| CNIH3              | Cornichon family AMPA receptor auxiliary protein 3                         | 80                       | 4                        |
| CNRIP1             | Cannabinoid receptor interacting protein 1                                 | 80                       | 0                        |
| SH3RF2             | SH3 domain containing ring finger 2                                        | 80                       | 6                        |
| BUB1               | BUB1 Mitotic Checkpoint Serine/Threonine Kinase                            | 79                       | 6                        |
| DTNA               | Dystrobrevin, alpha                                                        | 79                       | 0                        |
| MED23              | Mediator complex subunit 23                                                | 79                       | 0                        |
| PIP5K1B            | Phosphatidylinositol-4-phosphate 5-kinase, type I, beta                    | 79                       | 6                        |
| PRSS35             | Protease, serine, 35                                                       | 79                       | 0                        |
| C20orf112          | Chromosome 20 open reading frame 112                                       | 78                       | 6                        |
| PLCE1              | Phospholipase C, epsilon 1                                                 | 78                       | 0                        |

|         |                                                                                                     |    |    |
|---------|-----------------------------------------------------------------------------------------------------|----|----|
| EPB42   | Erythrocyte membrane protein band 4.2                                                               | 77 | 0  |
| PTGDR   | Prostaglandin D2 receptor (DP)                                                                      | 77 | 7  |
| KCNB1   | Potassium voltage-gated channel, Shab-related subfamily, member 1                                   | 74 | 4  |
| SOBP    | Sine oculis binding protein homolog (Drosophila)                                                    | 74 | 3  |
| ZNF471  | Zinc finger protein 471                                                                             | 74 | 2  |
| CDC25C  | Cell division cycle 25C                                                                             | 73 | 1  |
| HSD17B2 | Hydroxysteroid (17-beta) dehydrogenase 2                                                            | 73 | 0  |
| NEDD4L  | Neural precursor cell expressed, developmentally down-regulated 4-like, E3 ubiquitin protein ligase | 73 | 0  |
| SOX6    | SRY (sex determining region Y)-box 6                                                                | 73 | 3  |
| GATM    | Glycine amidinotransferase (L-arginine:glycine amidinotransferase)                                  | 72 | 0  |
| OLFML1  | Olfactomedin-like 1                                                                                 | 72 | 0  |
| DENND5B | DENN/MADD domain containing 5B                                                                      | 71 | 3  |
| C4orf32 | Chromosome 4 open reading frame 32                                                                  | 70 | 0  |
| FAM153B | Family with sequence similarity 153, member B                                                       | 70 | 5  |
| DYNC2H1 | Dynein, cytoplasmic 2, heavy chain 1                                                                | 69 | 5  |
| ELAVL2  | ELAV Like Neuron-Specific RNA Binding Protein 2                                                     | 69 | 0  |
| PEX5L   | Peroxisomal biogenesis factor 5-like                                                                | 69 | 0  |
| GNG4    | Guanine nucleotide binding protein (G protein), gamma 4                                             | 68 | 0  |
| KRT73   | Keratin 73                                                                                          | 68 | 0  |
| SEL1L2  | Sel-1 suppressor of lin-12-like 2 (C. elegans)                                                      | 68 | 2  |
| DIXDC1  | DIX domain containing 1                                                                             | 67 | 10 |
| MAOB    | Monoamine oxidase B                                                                                 | 67 | 0  |
| IGHD    | Immunoglobulin heavy constant delta                                                                 | 65 | 0  |
| LEPR    | Leptin receptor                                                                                     | 65 | 0  |
| RAB31   | RAB31, member RAS oncogene family                                                                   | 65 | 0  |
| GNG11   | Guanine nucleotide binding protein (G protein), gamma 11                                            | 64 | 0  |
| KLHDC1  | Kelch domain containing 1                                                                           | 64 | 0  |
| DTWD1   | DTW domain containing 1                                                                             | 63 | 2  |
| NR0B1   | Nuclear receptor subfamily 0, group B, member 1                                                     | 63 | 1  |
| AMDHD1  | Amidohydrolase domain containing 1                                                                  | 62 | 2  |
| CLEC4M  | C-type lectin domain family 4, member M                                                             | 61 | 0  |
| PMP22   | Peripheral myelin protein 22                                                                        | 61 | 3  |
| ADCYAP1 | Adenylate cyclase activating polypeptide 1                                                          | 60 | 1  |
| HM13    | Histocompatibility (minor) 13                                                                       | 60 | 0  |
| CMYA5   | Cardiomyopathy associated 5                                                                         | 59 | 0  |
| MCTP2   | Multiple C2 domains, transmembrane 2                                                                | 59 | 0  |
| SCAF4   | SR-Related CTD-Associated Factor 4                                                                  | 58 | 7  |
| MMP28   | Matrix metalloproteinase 28                                                                         | 57 | 2  |
| N4BP2L1 | NEDD4 binding protein 2-like 1                                                                      | 57 | 0  |
| PIK3C3  | Phosphatidylinositol 3-kinase, catalytic subunit type 3                                             | 57 | 4  |
| PTGER3  | Prostaglandin E receptor 3 (subtype EP3)                                                            | 57 | 0  |
| TRAF4   | TNF receptor-associated factor 4                                                                    | 57 | 3  |
| CASC5   | Cancer susceptibility candidate 5                                                                   | 56 | 3  |
| SYT4    | Synaptotagmin IV                                                                                    | 50 | 0  |
